# Supplementary material for: Molecular characteristics and prognostic significances of lysosomal-dependent cell death in kidney renal clear cell carcinoma
Source: publisher site journal article supplement (doi:10.18632/aging.205639), 2024-03-07
Supplement: Supplementary file [file aging-v16i5-205639-supplementary-material-SD1.pdf]

## SUPPLEMENTARY FIGURES

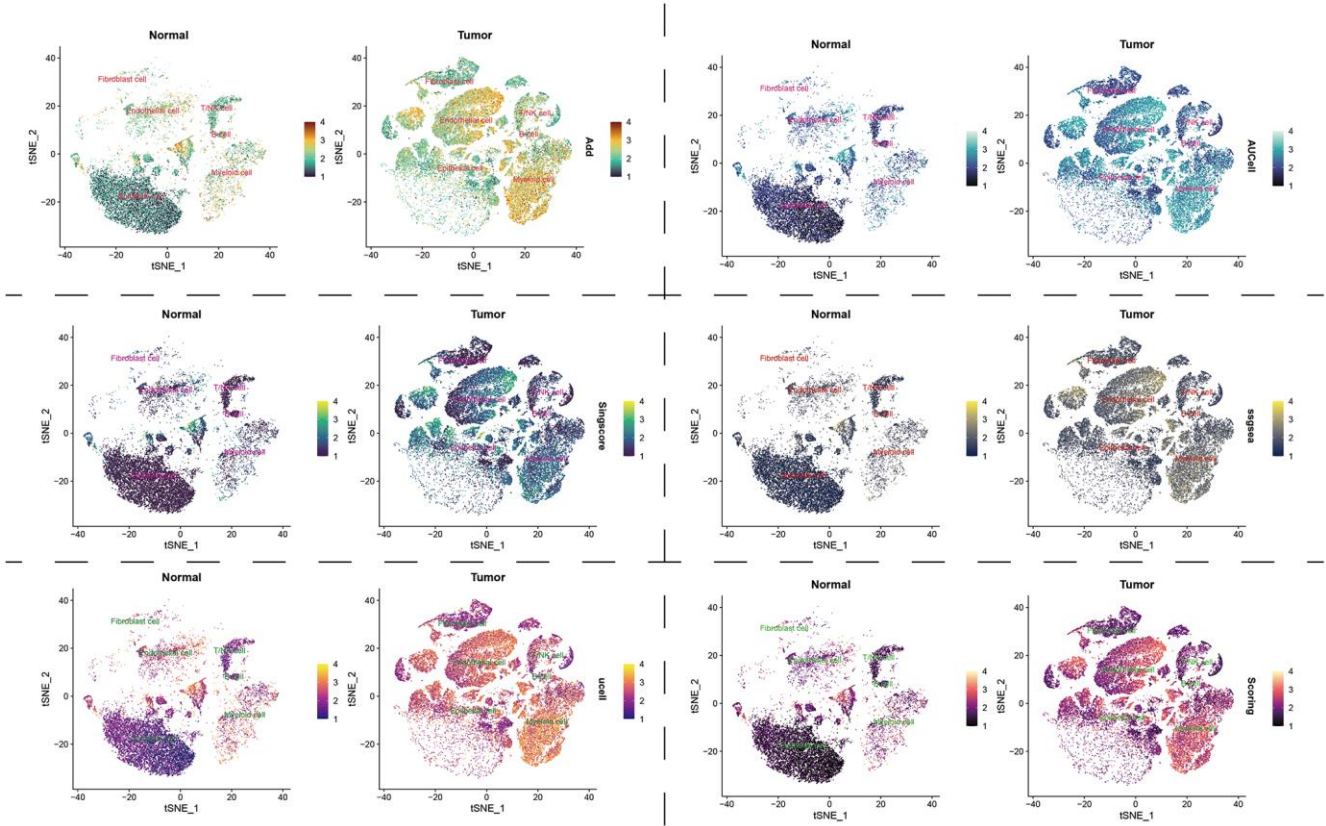

**Supplementary Figure 1. LDCD signal characteristics of cancer tissue and normal tissue at single-cell resolution (predicted by Add, AUCell, UCell, ssgsea, singscore, and scoring algorithms). Abbreviation: LDCD: Lysosomal-dependent cell death.**

Normal kidney 1

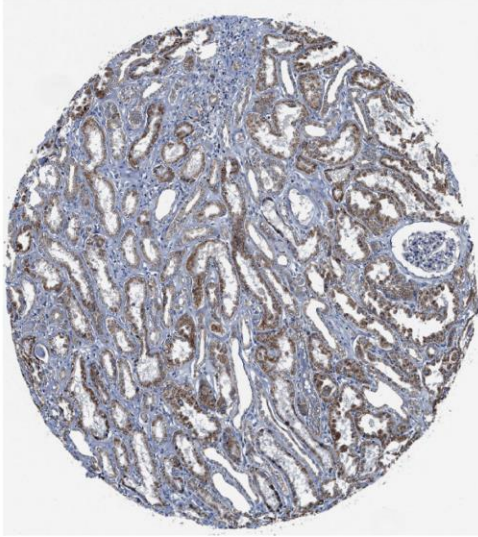

Normal kidney 2

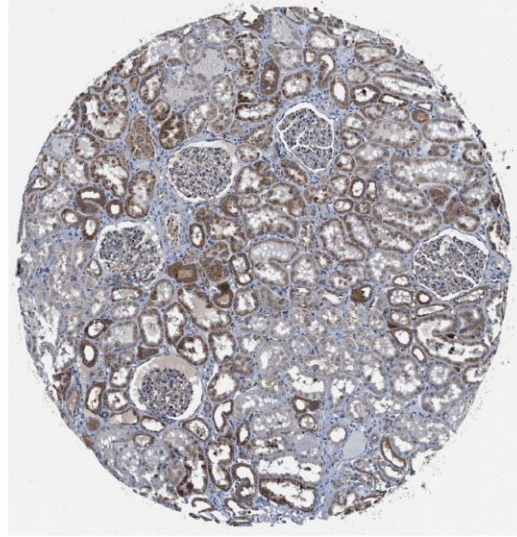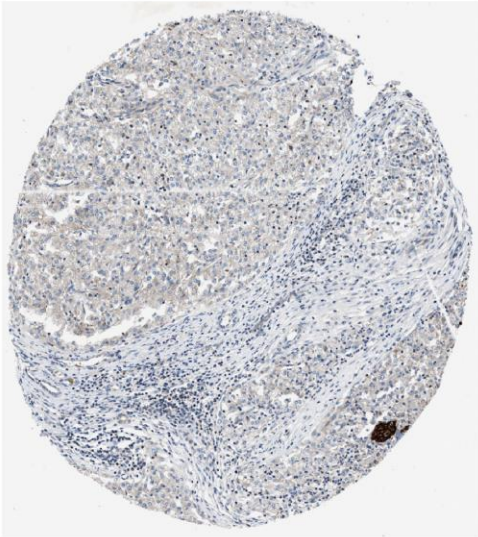

Kidney cancer 1

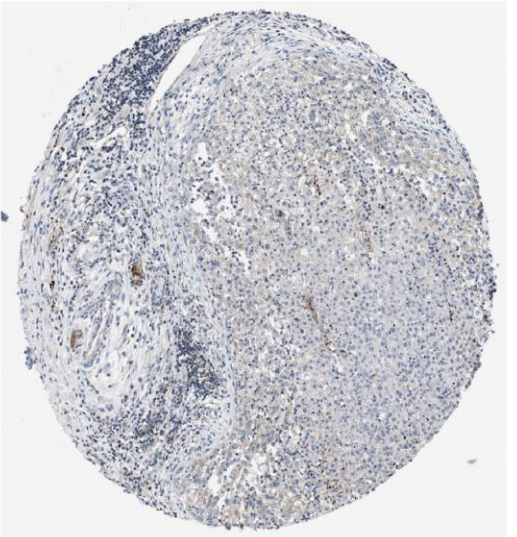

Kidney cancer 2

Supplementary Figure 2. Immunohistochemical results of PHLPP1.
