# Supplementary material for: Molecular characteristics and prognostic significances of lysosomal-dependent cell death in kidney renal clear cell carcinoma
Source: Aging (Albany NY). 2024 Mar 7;16(5):4862–88. doi: 10.18632/aging.205639 (PMC10968703; doi:10.18632/aging.205639)
Supplement: Supplementary Tables 1 and 2 [file aging-16-205639-s002.xlsx]

## Sheet: Sheet1
Supplementary Table 1. 255 lysosome-dependent cell death-related genes.
TP53
EGFR
AKT1
ATM
TNF
PDCD1
MTOR
VHL
H19
IL6
CDK4
STK11
PTPN11
CD274
DAPK1
RIPK1
ABL1
TGFBR2
FGFR2
XIAP
HIF1A
ICAM1
IL1B
CFLAR
JAK2
SRC
MIR125A
IKBKB
PPARG
PARP1
EGF
MCL1
TSC2
IGF1R
LINC-ROR
MAPK14
CBL
MITF
TSC1
BCL2L11
BDNF-AS
NLRP3
MIR133B
YAP1
CD36
HSP90AA1
MIR494
CDK6
PTGS2
GBA1
MIR7-3HG
HMGB1
FLT1
STK4
SQSTM1
TRAF2
SMPD1
GSK3B
LINC01672
CHEK1
IL6ST
HULC
PROM1
CERNA3
TFEB
NOTCH3
FOXO3
SHC1
TMX2-CTNND1
TRAF6
HSPA5
CTSD
SIRT1
SCARNA5
RIPK3
CD86
SERPINB3
PKM
CTSB
SOD2-OT1
ITGA5
VCP
PKLR
BECN1
PARK7
CTNND1
RPS27A
HDAC6
XRCC5
HCK
MAP3K7
HSPA8
MIR33A
AHR
LAMP2
EMSLR
ANXA2
VTN
BAG3
TAB2
IL1R1
DIRC3
MIR155HG
CD1D
PRKAA1
UBC
C9orf72
DDR1
IRF3
ARSA
CUL1
NEDD4
CTSK
ATG5
IRAK1
STUB1
HOTAIRM1
CAPN1
PPIA
GDF15
IFNGR1
CTSL
STING1
MCOLN1
IAPP
KCNB1
LAMP1
RPS6KA3
ROR2
SNHG5
CSNK1A1
RB1CC1
HSP90AB1
TRIM28
GAA
RPTOR
UBB
PEBP1
CBLB
IFNAR1
IFNAR2
TRC-GCA24-1
RAB7A
CLCN7
VPS33A
UBE2D1
APOD
PHLPP1
HGS
GABRA1
TNK2
NUMB
OFD1
CLDN5
RAB5A
MAP1LC3A
ULK1
AQP2
DACT1
VAMP8
TRIM21
SLC1A5
MAP1LC3B
ARL8B
CSNK1E
RNF40
CRMA
SBF2
TRIM25
MSTN
LGALS8
TAB3
UBE2D3
ABL2
NCOA4
MIR33B
GABARAPL1
AGFG1
SNAP23
UBE2E1
ATP13A2
GABARAP
CLOCK
CALCOCO2
TMEM131L
ULK2
ATG13
UBE2D2
VPS4B
RING1
ENSG00000232995
PLEKHM1
SHFL
MID1
SIGLEC15
FYCO1
BACE2
STX5
RNF41
MARCHF1
SMCR8
VPS11
VAMP7
GABARAPL2
MCOLN2
MCOLN3
RAB21
VPS16
PDE1C
MREG
VPS18
HAGLROS
ATG4A
EI24
NLRP6
ACP2
GPSM1
ILKAP
CBLL1
TRD-GTC9-1
MIR543
CACYBP
ROBO3
CTSV
MAEL
MKRN2
SCFD1
TRIM69
STX6
LAMTOR5
HERC4
VPS41
SLC2A12
SEC22B
HYMAI
NONHSAG046336.2
C1QL3
MIRLET7BHG
LINC00265
MAP1LC3C
KDM7A
EIF2AK3-DT
MIR1262
C1orf220
TRG-GCC2-6
TIFAB
MIR585
TRG-GCC2-1
TRG-GCC2-3
TRG-GCC2-2
TRG-TCC1-1
TRG-GCC2-4
TRG-GCC2-5
MIR1268B
MIR1268A

## Sheet: Sheet2
Supplementary Table 2. 50 prognosis-related genes in TCGA and E-MTAB-1980 cohorts.
id	HR	HR.95L	HR.95H	pvalue	FDR
GPSM1	2.22271	1.76915	2.79255	6.92e-12	8.58e-10
VPS4B	0.399354	0.303294	0.525838	6.21e-11	3.85e-09
FLT1	0.72828	0.659825	0.803837	3.06e-10	1.27e-08
HGS	3.72465	2.43911	5.68775	1.14e-09	3.54e-08
IGF1R	0.553896	0.455333	0.673793	3.44e-09	8.52e-08
ROBO3	1.74925	1.43041	2.13916	5.14e-08	1.06e-06
IL6	1.19581	1.12041	1.27628	7.37e-08	1.31e-06
IFNAR1	0.472724	0.359824	0.621049	7.4e-08	1.15e-06
RAB21	0.365341	0.252214	0.52921	1e-07	1.38e-06
SBF2	0.501544	0.382424	0.657769	6.11e-07	7.57e-06
UBB	0.475972	0.352061	0.643494	1.4e-06	1.58e-05
CALCOCO2	0.44893	0.3232	0.623571	1.78e-06	1.84e-05
C1orf220	1.77822	1.36335	2.31934	2.17e-05	0.000207077
GABARAPL2	0.417169	0.278386	0.625138	2.27e-05	0.00020122
PEBP1	0.604354	0.478659	0.763056	2.31e-05	0.000190572
MIR155HG	1.34727	1.17175	1.5491	2.85e-05	0.000220638
ACP2	2.05626	1.46112	2.89381	3.55e-05	0.000258785
VPS11	0.508851	0.368505	0.702648	4.07e-05	0.000280535
ROR2	1.26747	1.12662	1.42592	8.03e-05	0.000524026
PHLPP1	0.559383	0.418329	0.748	8.91e-05	0.000552484
VTN	1.21949	1.10364	1.34749	9.76e-05	0.000576376
MAP1LC3C	1.3826	1.1739	1.6284	0.00010427	0.000587703
NLRP6	0.731607	0.62178	0.860832	0.000166094	0.000895461
SMCR8	0.641757	0.508506	0.809926	0.000187477	0.000968632
FYCO1	0.584138	0.439327	0.776681	0.000216768	0.00107517
ILKAP	1.95604	1.34064	2.85392	0.00049979	0.00238361
LAMTOR5	0.570867	0.410679	0.793538	0.0008494	0.00390095
BAG3	0.634797	0.482066	0.835917	0.00121091	0.00536262
GABARAP	0.549726	0.379957	0.795349	0.00149848	0.00640728
ULK1	1.45298	1.14605	1.84209	0.00202892	0.00838622
CBL	0.642636	0.480908	0.858752	0.0027947	0.0111788
TRAF2	1.61126	1.17229	2.21461	0.00328755	0.0127393
IFNAR2	1.63388	1.17691	2.26827	0.00335557	0.0126088
CLOCK	0.636541	0.467353	0.866977	0.00416384	0.0151858
VPS33A	2.41338	1.31259	4.43732	0.00457785	0.0162187
TRIM28	1.78234	1.16491	2.72702	0.00773452	0.0266411
AHR	0.767726	0.631106	0.933922	0.00820002	0.0274811
GABARAPL1	0.740793	0.592656	0.925957	0.00839499	0.0273942
SIGLEC15	1.39608	1.0888	1.79009	0.00852112	0.0270928
STK11	1.79184	1.15681	2.77547	0.00899044	0.0278704
EGFR	0.831884	0.722577	0.957726	0.010439	0.0315716
OFD1	1.43536	1.08623	1.89669	0.0110328	0.0325732
STUB1	0.706874	0.540015	0.925292	0.0115646	0.0333492
MCOLN2	1.24378	1.04735	1.47706	0.0128667	0.0362608
MCOLN3	0.68764	0.509757	0.927596	0.0142028	0.0391367
PTGS2	1.14974	1.02693	1.28722	0.0154713	0.0417052
PPIA	1.62043	1.0923	2.40389	0.0164526	0.0434069
ICAM1	1.2356	1.03787	1.471	0.0174197	0.0450009
PDCD1	1.14802	1.02258	1.28886	0.01938	0.0490434
CTSK	1.13469	1.02006	1.26221	0.0200441	0.0497093
